# Supplementary material
Source: ML conference proceedings conference paper supplement (https://openaccess.thecvf.com/content/ICCV2023/html/Hu_Unsupervised_Feature_Representation_ICCV_2023_paper.html)
Supplement: Supplementary file 1 [file Hu_Unsupervised_Feature_Representation_ICCV_2023_supplemental.pdf]

# Unsupervised Feature Representation Learning for Domain-generalized Cross-domain Image Retrieval

Conghui Hu      Can Zhang      Gim Hee Lee

Department of Computer Science, National University of Singapore

conghui@nus.edu.sg

can.zhang@u.nus.edu

gimhee.lee@nus.edu.sg

## 1. Examples of datasets

The four cross-dataset pairs for cross-category DG-UCDIR are: P-Sketch and D-Quickdraw, P-Cartoon and D-Clipart, P-Art painting and D-Painting, P-Photo and D-Real.

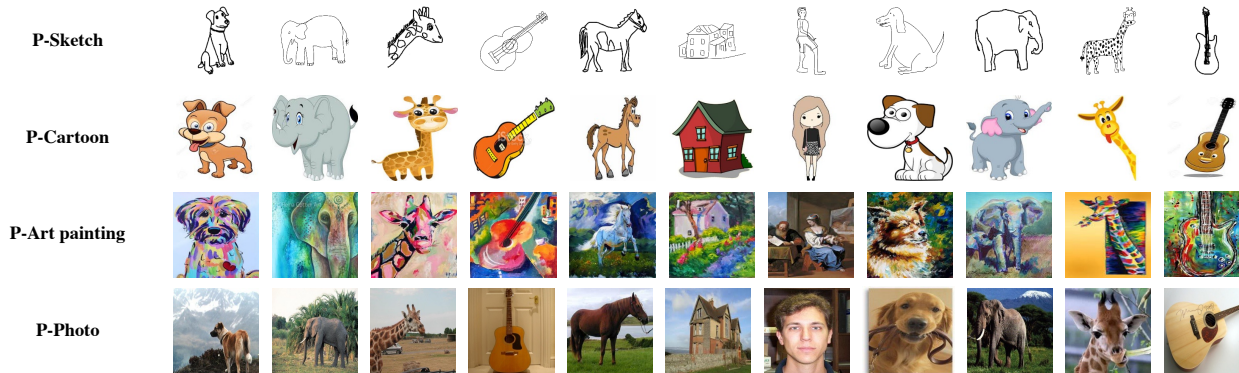

Figure 1. Examples of PACS dataset

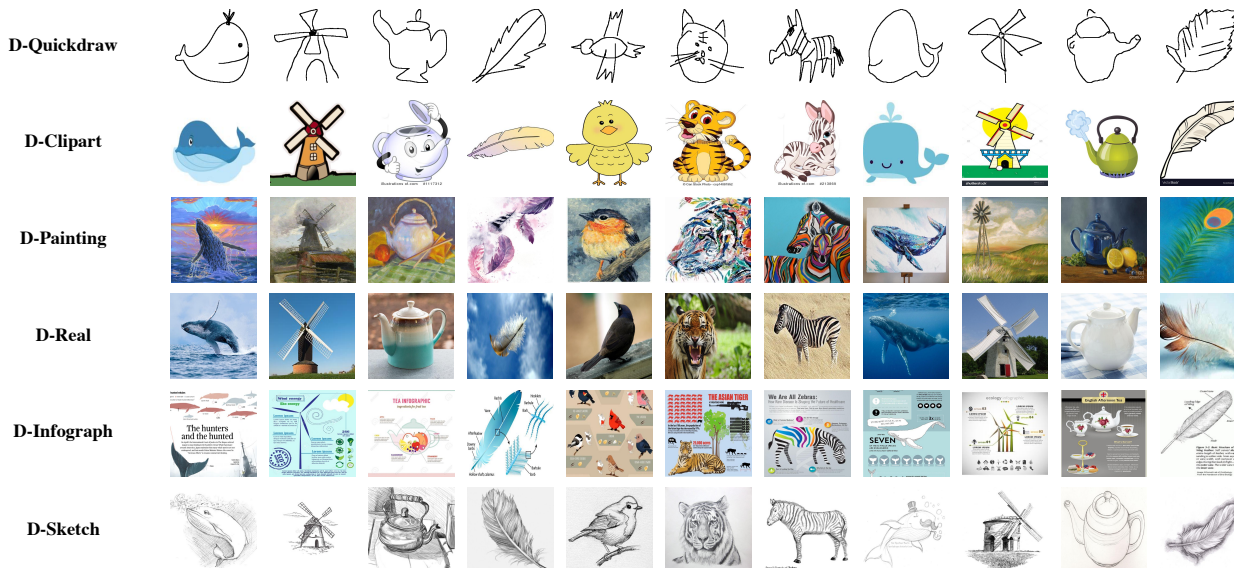

Figure 2. Examples of DomainNet dataset

## 2. Qualitative retrieval results

Fig. 3 and Fig. 4 show the qualitative retrieval results on PACS and DomainNet datasets. Ours achieves superior cross-domain retrieval performance over all baselines.

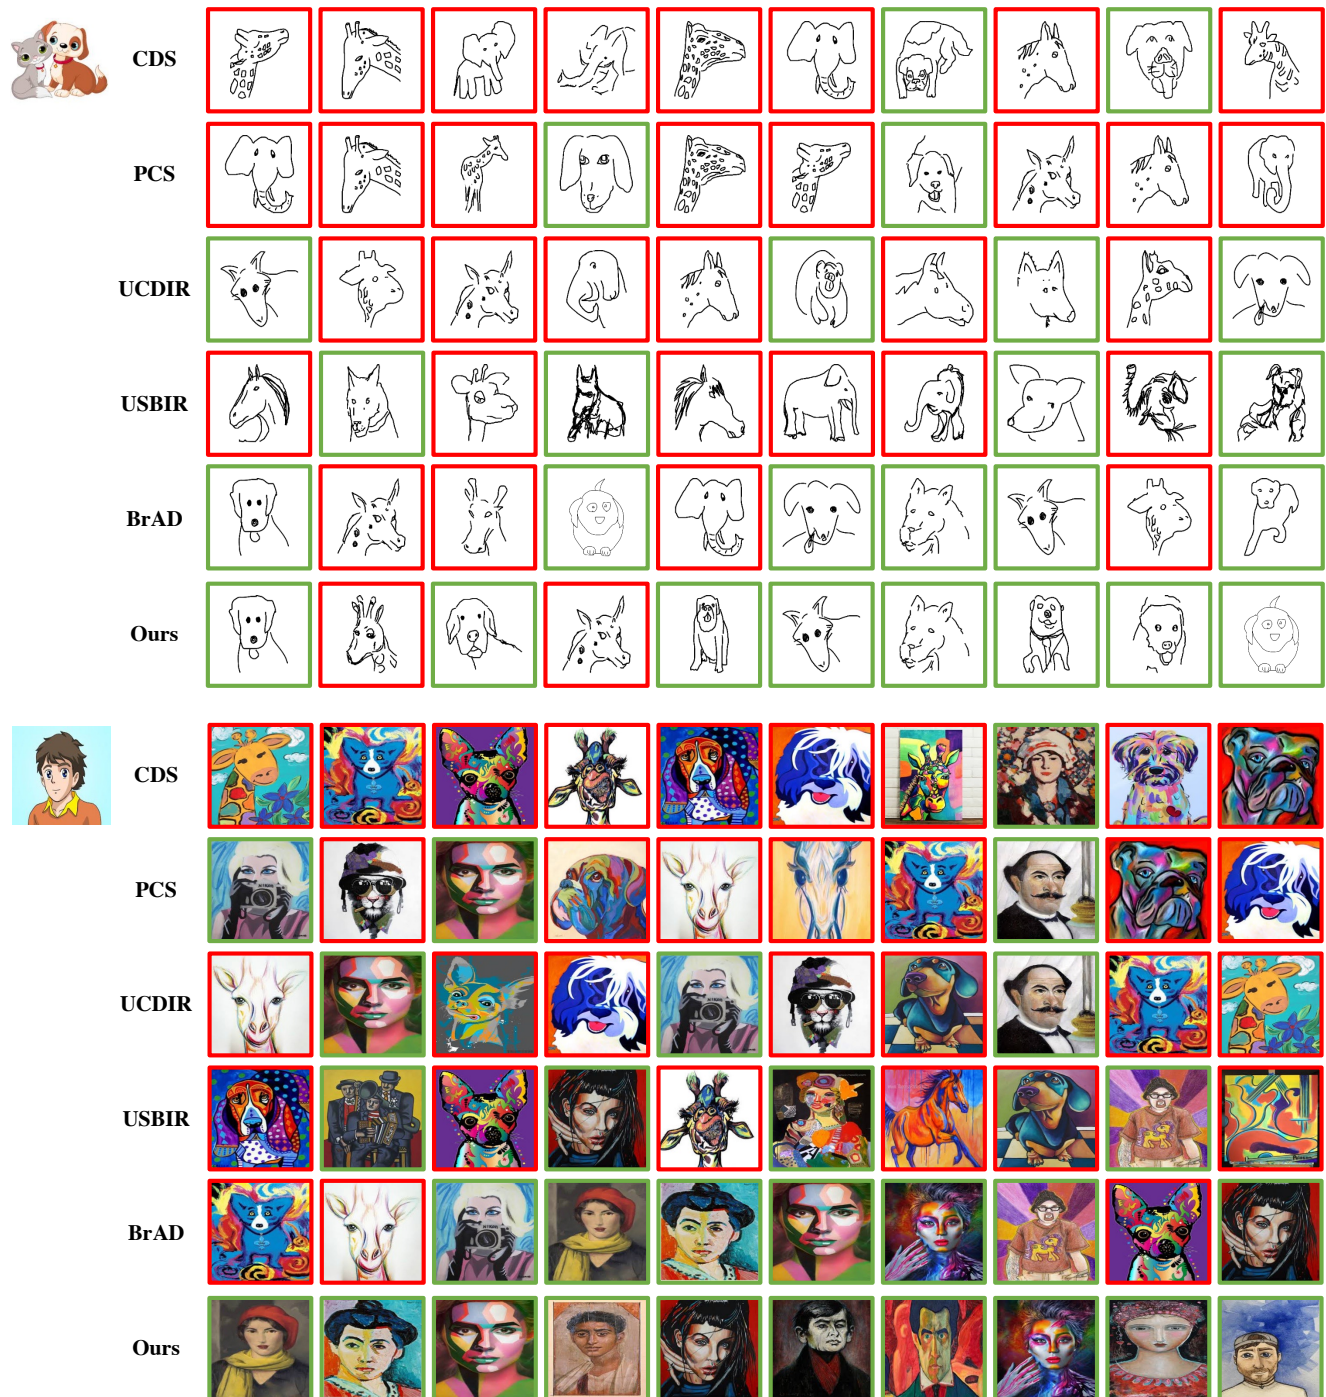

Figure 3. Top 10 retrieval results on PACS dataset. Correct and incorrect retrievals are highlighted in green and red, respectively.

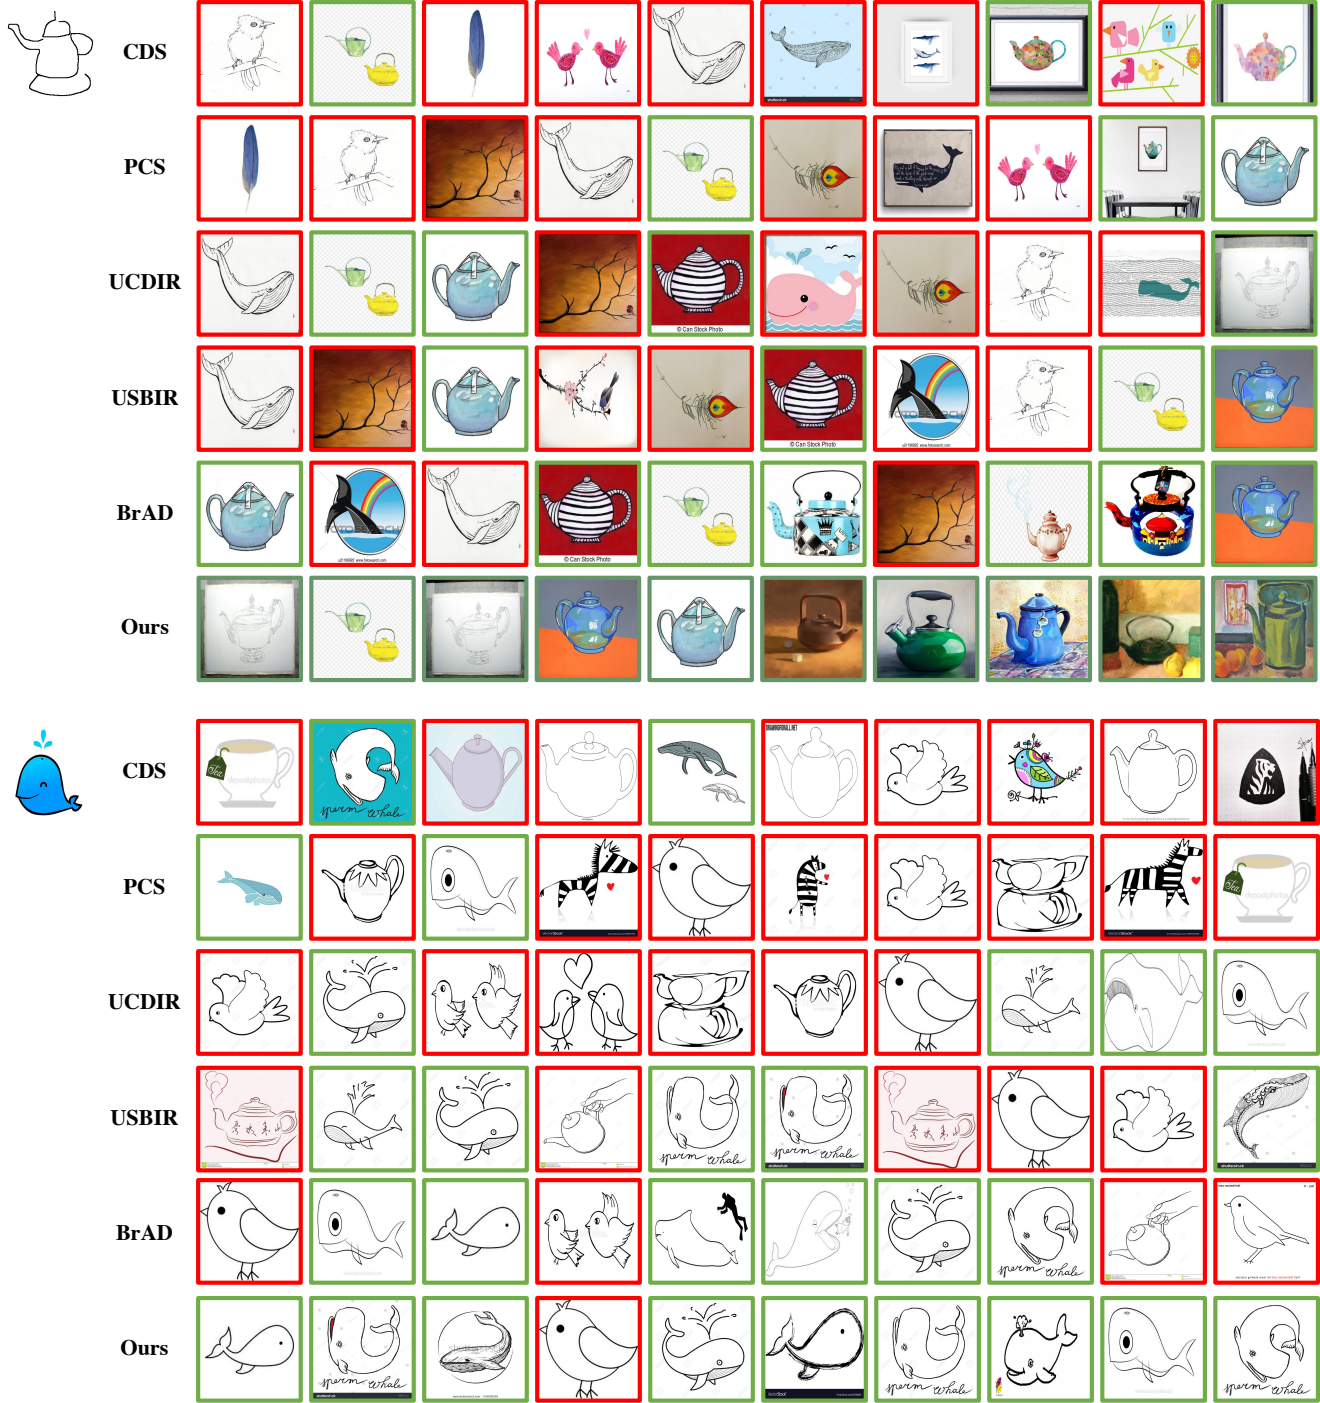

Figure 4. Top 10 retrieval results on DomainNet dataset. Correct and incorrect retrievals are highlighted in green and red, respectively.
